1 **Placental telomere length shortening is not associated with preeclampsia but the gestational age**

2

3 Xiaotong YANG, MS<sup>1</sup>, Department of Computational Medicine and Bioinformatics, University  
4 of Michigan, Ann Arbor, Michigan, United States of America

5 Paula A BENNY<sup>2</sup>, PhD, Epidemiology Program, University of Hawaii Cancer Center, Honolulu,  
6 Hawaii, United States of America

7 Elorri CERVERA-MARZAL<sup>1</sup>, MS, Department of Computational Medicine and Bioinformatics,  
8 University of Michigan, Ann Arbor, Michigan, United States of America

9 Biyu WU<sup>3</sup>, MS, Department of Nutritional Science, University of Hawaii, Honolulu, Hawaii,  
10 United States of America

11 Cameron LASSITER<sup>2</sup>, MS, <sup>2</sup>Epidemiology Program, University of Hawaii Cancer Center,  
12 Honolulu, Hawaii, United States of America

13 Joshua ASTERN<sup>4</sup>, PhD, University of Hawai'i Biorepository, Burns School of Medicine,  
14 University of Hawaii at Manoa, Honolulu, United States of America

15 Lana X. GARMIRE<sup>1</sup>, PhD, \* Department of Computational Medicine and Bioinformatics,  
16 University of Michigan, Ann Arbor, Michigan, United States of America

17

18 **Conflict of Interest**

19 The authors declare no conflict of interest.

20

21 **Role of the funding source.**

22 This research was supported by grants K01ES025434 awarded by NIEHS through funds

23 provided by the trans-NIH Big Data to Knowledge (BD2K) initiative ([www.bd2k.nih.gov](http://www.bd2k.nih.gov)), P20

24 COBRE GM103457 awarded by NIH/NIGMS, R01 LM012373 and R01 LM012907 awarded by  
25 NLM, and R01 HD084633 awarded by NICHD to L.X. Garmire.

26

27 **Corresponding Author**

28 Lana X Garmire

29 1600 Huron Parkway, Ann Arbor, Michigan USA 48105

30 734- 615-0514 (office)

31 Email: [lgarmire@med.umich.edu](mailto:lgarmire@med.umich.edu)

32

33

34

35

36

37

38

39

40

41

42

43

44

45 Word count (abstract): 282

46 Word count (main text): 2951

47 **Condensation**

48 Placental telomere length shows no significant association with preeclampsia but significantly  
49 shortens with the progressing gestational age at different rates for male and female babies.

50

51 **Short Title**

52 Placental telomere shortening and preeclampsia

53

54 **AJOG At A Glance**

55 **A. Why was this study conducted?**

- 56 • Understanding the TL change in healthy and preeclampsia complicated placenta may  
57 help us better understand the physio-pathological impact of preeclampsia.

58 **B. What are the key findings?**

- 59 • We found no significant association between severe preeclampsia and placental TL in the  
60 largest multi-ethnic cohort to date.
- 61 • Placental TL shortens consistently largely due to gestational age increase.
- 62 • Placentas of male babies have shorter TLs at the early third trimester but slower TL  
63 shortening compared to those of female babies.
- 64 • Latino mothers have longer placental TL compared to non-Latino mothers.
- 65 • Mothers of blood type O have shorter placenta TL than others.

66 **C. What does this study add to what is already known?**

- 67 • We showed that placental telomere length shortening is not associated with preeclampsia  
68 but the gestational age in a large multi-ethnic cohort.

69

## 70 **STRUCTURED ABSTRACT**

### 71 **Background**

72 Preeclampsia is a severe pregnancy complication that affects about 2-8% of pregnant women  
73 globally and is one of the leading causes of maternal and fetal mortality and morbidity. Telomere  
74 length change has been associated with aging, environmental stress, and various diseases.  
75 Studying the telomere length change in preeclampsia complicated placentas may shed light on  
76 the pathophysiology of preeclampsia.

### 77 **Objectives**

78 In this study, we aimed to explore if associations exist between placental telomere length and  
79 preeclampsia, gestational age, and other demographic, clinical and physiological factors related  
80 to pregnancy.

### 81 **Study Design**

82 We collected placentas samples from 120 severe preeclamptic deliveries and 129 healthy full-  
83 term deliveries in Hawaii between year 2006 and 2013 and measured the average absolute  
84 placental telomeres with quantitative polymerase chain reaction (qPCR). We retrieved their pre-  
85 recorded demographic, clinical and physiological data and conducted multiple linear regressions  
86 to associate placental telomeres with preeclampsia and other variables.

### 87 **Results**

88 Placental telomere length of severe preeclampsia cases showed no significant difference ( $P=0.20$ )  
89 from healthy controls after controlling for gestational age difference. Instead, we identified that  
90 placental telomere length consistently decreases as gestation progresses ( $P=6.10e-05$ ). Male  
91 babies have shorter placental telomere than female babies in the early trimester ( $p = 0.024$ ), but  
92 the placentas of male babies have a reduced rate of telomere shortening along pregnancies,

93 compared to those of female babies ( $p = 0.029$ ). Latino mothers show longer placenta telomeres  
94 than other ethnicities ( $P=0.012$ ), whereas mothers of blood type O have shorter placenta  
95 telomeres than those of other blood types ( $P=0.039$ ).

96

## 97 **Conclusions**

98 Using the largest multiethnic cohort to date, we showed the lack of association between  
99 preeclampsia and placental telomere length. Rather, gestational age is the most dominant  
100 variable associated with placental telomere shortening.

101

102

## 103 **Keywords**

104 Preeclampsia, placenta, telomere length, gestational age, ethnicity, sex, blood type.

105

106

107

108

109

110

111

112

113

114

115

116

## 117 INTRODUCTION

118 Preeclampsia (PE) is a pregnancy syndrome in women after 20 weeks of pregnancy.<sup>1</sup> The two  
119 major clinical symptoms are gestational hypertension (systolic blood pressure  $\geq$  140 mm hg or  
120 diastolic blood pressure  $\geq$  90) and proteins in urine. Other clinical symptoms include renal  
121 failure, cardiac dysfunction or arrest, stroke, and even maternal and fetal fatalities.<sup>1</sup> The average  
122 incidence rate of preeclampsia is about 2-8% globally and 3.1% in the United States.<sup>2, 3</sup>

123 Preeclampsia is one of the leading causes of pregnancy-related mortality and is associated with  
124 many long-term maternal and fetal morbidities. Major risk factors of preeclampsia include prior  
125 preeclampsia, chronic hypertension, multiple gestation, higher body mass index (BMI),  
126 pregestational diabetes, and antiphospholipid syndrome.<sup>4</sup> Preeclampsia is an intricate and  
127 heterogeneous disorder containing multiple subtypes: based on the severity of the symptoms,  
128 preeclampsia can be classified as mild, severe or superimposed<sup>1</sup>; based on the occurrence time,  
129 preeclampsia that appears before week 34 of gestation is considered early-onset preeclampsia  
130 and after week 34 is called late-onset preeclampsia<sup>5</sup>. Epigenetic, transcriptomic, proteomic, and  
131 metabolic approaches were adapted in preeclampsia studies recently, however, the molecular  
132 mechanisms leading to these symptoms are still not fully understood.<sup>6,7</sup>

133  
134 Telomeres consist of repeated DNA sequences and protective protein complexes. They function  
135 as the protective structures at chromosome ends.<sup>7</sup> Telomeres shorten continuously in each cell  
136 division and the process may be accelerated by chorionic diseases and environmental stress.<sup>9</sup> The  
137 telomere length (TL) contains important information about cellular state, and it has been  
138 considered a biomarker for aging<sup>10</sup>. Placentas play a central role in PE, and it is believed that the  
139 onset of PE originated from defective placentation, and the release of antiangiogenic factors from

140 the placenta into the maternal circulation. Previous epigenetic studies have suggested accelerated  
141 aging in placentas from early-onset PE<sup>11</sup>. Therefore, it is of great interest to investigate if such  
142 presumably “pre-aging” stress exerted in placenta epigenetics is also manifested in TL  
143 shortening. However, various other factors may significantly confound placenta TL  
144 interpretation, such as gestational age, ethnicities, the geolocation of the tissue samples taken  
145 from the placenta. Failure to address these important confounders may have contributed to the  
146 previous controversy regarding the association between PE and placental TL<sup>12,13,14</sup>.  
147 To resolve this issue, we conducted the largest multiethnic cohort (MEC) study so far, containing  
148 placentas of 120 severe PE and 129 matched full-term deliveries from the Hawaii Biorepository  
149 (HiBR). The placenta tissues were obtained from deliveries in Kapiolani Women and Children’s  
150 Hospital in Honolulu, Hawaii between January 2006 and June 2013. We measured the total  
151 placental TL by qPCR technology, and then conducted linear regression analysis between  
152 placental TL and physiological and clinical factors. Our objectives are: (1) studying if there is  
153 indeed an association between severe PE and placental TL shortening; (2) revealing other  
154 potential maternal or fetal factors associated with placental TL.

155

## 156 **MATERIAL AND METHODS**

### 157 **Biospecimens**

158 Biospecimens were obtained from the Hawaiian Biorepository (IRB #CHS23976). Placenta  
159 samples were collected from the intermediate portion of the placenta after maternal and fetal  
160 membranes were trimmed away. Samples with neonatal malformation were removed from the  
161 analysis. As a result, samples from 249 women (120 with severe PE and 129 full-term healthy  
162 controls), who delivered their babies in Hawaii between January 2006 and June 2013 were

163 collected and analyzed in this study. Severe PE was defined as sustained pregnancy-induced  
164 hypertension with urine protein and/or organ dysfunction according to the diagnosis of OBGYNs  
165 in Kapiolani Medical Center. For each case, a matched control sample was identified using  
166 mother age, prepregnant body mass index (BMI) and ethnicity group as the matching criteria.

167

### 168 **Average absolute TL measurement**

169 The placenta tissue samples were stored at -80°C. The genomic DNA extracted from placenta  
170 tissue was performed using AllPrep DNA/RNA/Protein Mini Kit (Qiagen, USA) according to the  
171 manufacturer's instructions. Briefly, 30mg of frozen placenta tissue samples were weighted in a  
172 50 ml Falcon tube (VWR, USA) and mixed with 600 µl buffer RLT (Qiagen, USA)  
173 supplemented with 1% β-mercap-toethanol (Sigma). The tissue was then homogenized with  
174 Tissue Ruptor II (Qiagen, USA) for 30 seconds at medium speed. The lysate was transferred to a  
175 2 ml microcentrifuge tube and centrifuged for 3 minutes at 13,000g at 4 °C. Then the supernatant  
176 was pipetted into an AllPrep DNA spin column (Qiagen) and processed following Kit's  
177 instruction. The DNA concentration and purity were evaluated by NanoDrop2000  
178 spectrophotometer (Thermo Scientific, Waltham, USA) and the DNA integrity was investigated  
179 by electrophoresis in 1% agarose gel with ethidium bromide (Sigma).

180 The average TL of placenta tissue samples was measured using the Absolute Human TL  
181 Quantification qPCR assay Kit (AHTLQ, ScienCell Research Laboratories, USA). Each sample  
182 was tested in duplicate with StepOne™ Real Time System (Applied Biosystems, USA) using 96-  
183 well reaction plates. The melting curve was observed to evaluate the specificity and efficiency of  
184 the qPCR reaction. The Comparative  $\Delta\Delta Cq$  (Quantification Cycle Value) method was applied to  
185 calculate the relative average TL of target tissue samples<sup>15</sup>. A 100 bp region single copy



186 reference (SCR) primer set on chromosome 17 was used as the reference. The absolute TL is  
187 calculated as the relative TL multiplied by the SCR TL.

188

### 189 **Demographical, clinical and physiological data**

190 A total of 20 demographical, clinical and physiological variables obtained from the University of  
191 Hawaii HiBR biobank were used in this study: mother's age, height, pre-pregnancy BMI, weight  
192 gain during pregnancy, blood type (A vs non-A, B vs non-B and O vs non-O), ethnicity (Asian  
193 vs non-Asian, Caucasian vs non-Caucasian, Latin vs non-Latin and Pacific Islander vs non-  
194 Pacific Islander), history of asthma, history of anemia, chronic hypertension, macrosomia,  
195 membrane ruptured, vaginal bleeding, babies' sex, gestational age in weeks, and sample group.  
196 The missing values were imputed with the predictive mean match (PMM) algorithm from R  
197 package "*mice*"<sup>16</sup>.

198

### 199 **Statistical analysis**

200 Two-sided Welch t-tests and Chi-squared tests were used to compare numeric and categorical  
201 characteristics between case and control groups. Logistic regression was performed to measure  
202 the correlations between severe PE and other demographical and clinical variables. The  
203 proportional variance explained (PVE) values of all variables were calculated using eta-values  
204 from the 1-way ANOVA result. The PVE value describes the proportion of total variance in data  
205 that can be explained by a certain variable, demonstrating its importance<sup>17</sup>. The absolute  
206 telomere length was ln-transformed to reduce skewness and ensure normality. TL refers to ln-  
207 transformed placental TL unless stated otherwise.

208 A multiple linear regression model was constructed by regressing TL of 249 samples on all 20  
209 variables and the most significant interaction between gestational age and infant sex. We refer to  
210 this model as the full model. To select the most relevant variables and improve model fitness, we  
211 applied the stepwise selection algorithm on the full model to search for the optimal model with  
212 the lowest Akaike Information Criterion (AIC), by adding or removing one variable at a time.  
213 This stepwise selected model is referred to as the optimal model, including 7 variables:  
214 gestational age, history of Asthma, Baby's sex, Blood type O, Latino ethnicity, and the  
215 interaction between baby's sex and gestational age.  
216 All analyses were conducted with different packages in R software version 4.0.2.<sup>18</sup> “*tidyr*”, and  
217 “*dplyr*” were used in data cleaning; “*mice*” was used to impute missing values; “*stats*” and  
218 “*MASS*” was used in statistical analysis; “*ggplot2*”, “*gridExtra*”, “*ggsignif*” and “*corrplot*” were  
219 used in visualization<sup>16,19-25</sup>. All R script used in this project is in repository.

220

## 221 **RESULTS**

### 222 **Overview of the study cohort**

223 We present the phenotypic characteristics of 120 pregnancies with severe PE and 129 healthy  
224 controls in Table 1. There is no significant difference in age, height, BMI, blood type, ethnicity  
225 and weight gain between the severe PE cases and controls, confirming the success of matching  
226 criteria in the study design. Significantly more mothers from the severe PE group have other pre-  
227 existing conditions including the history of anemia ( $p = 0.024$ ) and chorionic hypertension ( $p =$   
228  $5.58e-05$ ). More mothers from the control group have experienced vaginal bleeding ( $p=9.70e-3$ )  
229 and the rupture of membrane ( $p=7.30e-3$ ). Babies from the control group are more likely to have  
230 macrosomia ( $p = 0.023$ ). The PE group has a much smaller gestational age ( $p < 2.83e-29$ ): the

231 average and standard deviation of the gestational age in severe PE cases is 35.35 weeks +/- 2.90  
232 weeks, compared to controls 39.33 weeks +/- 0.85. Further relationships between clinical  
233 variables can be found in the Pearson's correlation heatmap of all phenotypic variables  
234 (Supplementary Figure 1).

235  
236 The distribution of absolute TL is highly skewed with a long right tail (Supplement Figure 2A).  
237 To approximate the Gaussian distribution of linear regression, we ln-transformed TL, like  
238 others<sup>12</sup>. All the TL in the remaining report refers to ln-transformed TL unless noted otherwise.  
239 Ln-transformed TL has a bell-shaped distribution with values ranging from 4.55 to 6.73 (Figure  
240 1A). The average TL in PE cases is 5.59, significantly higher than the average value of TL in  
241 controls 5.41 ( $p = 7.18e-4$ ) (Table 1).

242

### 243 **Gestational age, instead of severe PE, shows significant association with TL**

244 Although placental TL is longer in the PE group from the exploratory analysis (Table 1), such  
245 difference may be due to other confounding factors, such as gestational age. Indeed, the logistic  
246 regression model using 19 other clinical variables to fit PE shows that gestational age has the  
247 strongest relationship with PE ( $\log_{10}(p\text{-value}) = 9.29$ ,  $p = 5.07e-10$ ), among other 3 variables that  
248 have significant correlations with PE: weight gain ( $\log_{10}(p\text{-value}) = 3.15$ ,  $p = 7.1e-3$ ), blood type  
249 B ( $\log_{10}(p\text{-value}) = 1.55$ ,  $p = 0.028$ ) and blood type A ( $\log_{10}(p\text{-value}) = 1.51$ ,  $p = 0.031$ ) (Figure  
250 1B). Moreover, when examining the contribution of all 20 phenotypic variables to TL variation,  
251 gestational age shows the highest and most dominant proportion variance of 5.49% explained  
252 according to the ANOVA test, much higher than that of 1.65% from the 2nd ranked Caucasian  
253 ethnicity, while severe PE is not ranked among the top 10 variables (Figure 1C). Thus, the

254 exploratory analyses coherently show the important relationship between gestational age and TL  
255 change in the third trimester.

256 To quantitatively delineate the relationship between TL and phenotypic factors including severe  
257 PE, we then constructed a full linear regression model by regressing placental TL on all 20  
258 demographic and clinical variables and significant pairwise interactions among them, using both  
259 PE and control samples (n=249). This full model shows no significant difference ( $P = 0.20$ ) in  
260 TL between PE patients and controls (Supplementary Table 1). We next determined the optimal  
261 model (Table 2), by applying the stepwise selection algorithm with the lowest Akaike  
262 Information Criterion (AIC) on the full model. Again, PE was excluded from the optimal model  
263 due to its lack of contribution to model fitness. Instead, placental TL shows a negative  
264 association with gestational age ( $\beta = -0.054$ ,  $p = 6.10e-5$ ) according to the optimal model  
265 (Figure 1D, Table 2). The consistent decrease in TL is correlated with the active cell divisions in  
266 the placenta through the last trimester of pregnancy.

267 To better control the confounding effect from gestational age on TL, we next focused on the  
268 subset of 29 PE patients who reached term gestational ages ( $\geq 38$  weeks), same as the 129  
269 control samples. Boxplot shows no significant difference ( $P = 0.73$ ) in TL between full-term PE  
270 and controls (Figure 1E). Further, we constructed a linear regression model of TL on all 20  
271 phenotypic variables on this subset (Supplementary Table 2). Again, it shows a lack of  
272 association between PE and TL ( $P = 0.65$ ). Additionally, we performed a gestational week  
273 stratified (weeks 38, 39 and 40+) comparison between full-term PE samples and their controls,  
274 who are matched on gestational age, ethnicity, mother's age and BMI. Again, boxplots show no  
275 significant difference ( $P = 0.77$ ,  $P = 0.85$ , and  $P = 0.88$ ) of TL between cases and controls in all  
276 gestational week strata (Figure 1F). In all, our analyses from many different perspectives all

277 show that the shorter telomeres observed in severe PE patients are mostly associated with the  
278 gestational ages rather than PE itself.

279

### 280 **Placental TL and infant sex, maternal ethnicity and maternal blood type**

281 Besides gestational age, the optimal model also revealed significant associations of placental TL  
282 to 6 other demographic or clinical variables: male baby (beta = -1.496, P = 0.024), interaction  
283 between male baby and gestational age (beta = 0.0386, P=0.029), Latino ethnicity (beta = 0.228,  
284 P= 0.012), and blood type O (beta = -0.106, P=0.039) (Table 3).

285

286 The association between placental TL and babies' sex is very interesting. Male babies have  
287 shorter placental TL at the beginning of pregnancies, but their TLs decrease at a slower rate  
288 compared to those of female babies. At gestational week 30, the log-transformed placental TLs  
289 of male babies is estimated 0.32 shorter than those of female babies. The difference keeps getting  
290 smaller as gestation progresses, and by week 38.7 male babies' estimated TLs are the same as  
291 those of female babies (Figure 2A). Oppositely, at week 40 the estimated TLs of male babies are  
292 even longer than that of female babies. Among mothers of different ethnicities, Latino mothers  
293 have longer placental TL than non-Latino mothers after adjusting for age difference (Figure 2B);  
294 no significant difference was found among placental TLs from Asian, Caucasian and Pacific  
295 Islander mothers. Intriguingly, mothers with blood type O have shorter TL compared to mothers  
296 with other blood types (Figure 2C).

297

## 298 **COMMENTS**

### 299 **Principal Findings**

300 The most major finding of this study is that placental TL shortening is not significantly  
301 associated with severe PE; rather, it shortens significantly as gestational age increases. Male  
302 babies have shorter placental TL in the early third trimester compared to female babies, but their  
303 TLs decrease at a slower rate. Latino mothers have longer placental TLs compared to non-Latino  
304 mothers. Mothers of blood type O have shorter TLs than mothers of other blood types.

305

### 306 **Results and Implications**

307 Our data analysis shows the lack of association between severe PE and placental TL, even  
308 though the severe PE samples do have longer TL. This apparent longer placenta TL in PE is  
309 mostly attributed to earlier gestational ages that accompany the preterm deliveries of babies of  
310 PE patients<sup>26</sup>. We have shown here that the dominant contributor for placenta TL shortening is  
311 gestational age, rather than the PE condition itself. When the placenta grows with the gestational  
312 age, cells divide and telomeres shorten<sup>27</sup>. Support to this conclusion comes from the quantitative  
313 multiple regression model, where the other potential confounders are considered. The lack of  
314 association between PE and placental TL agrees with several previous findings, where TL was  
315 measured by qPCR and telomere restriction fragments (TRF) method.<sup>13,14, 27</sup> The only study  
316 showing a negative association between PE and placental TL had a smaller sample size (14 PE  
317 cases, 20 controls).<sup>12</sup> This study also didn't report or adjust for other variables, though  
318 gestational age (36 +/- 1.41 for the PE, 37.15+/-3.9 for the controls) is less of a concern. It also  
319 used a different method Fluorescence in situ hybridization (FISH) for TL measurement. These  
320 differences in measurement approaches and statistical rigor may contribute to their different  
321 conclusions.

322 Another interesting finding is the slower TL decrease in placentas of male babies. Many previous  
323 studies have explored the relation of infant sex and placental, cord blood, or fetal leukocyte TLs,  
324 yet didn't reach a consensus on the significance of this relation<sup>28-31</sup>. The conflict may originate  
325 from the observed interactive effect of infant sex and gestational age on TL. Studies with larger  
326 variation in gestational age tend to report longer TL in female infants, which agrees with our  
327 finding that male infants have shorter TL until late in the third trimester<sup>28-30</sup>. The study that  
328 found no difference in TL between infant sexes had a very small standard deviation in  
329 gestational age (sd = 0.15)<sup>31</sup>. The short gestation age window may be responsible for such a  
330 conclusion.

331 Latino mothers were found with longer TL compared to non-Latino mothers after age adjustment,  
332 while no significant differences in TL were found among other ethnic groups. The previous  
333 studies found longer TLs in Hispanic adults compared to white adults but no significant  
334 difference in infant TL.<sup>32,33</sup> The longer TL in placentas associated with Latino mothers is the first  
335 time reported here, to our knowledge. Additionally, we also observe for the first time the  
336 association between maternal blood type O and shorter TL. In a systematic analysis of 9 studies,  
337 women with blood type O were found to have slightly less risk of preeclampsia than non-O  
338 blood type<sup>34</sup>. However, in our data blood type didn't show significant interaction with severe  
339 preeclampsia. The connection between blood type and TL is still significant after controlling for  
340 preeclampsia. Future works are needed to explore more mechanisms of longer TL in Latinos and  
341 shorter TL associated with maternal blood type O. The potential missing components are the  
342 baby's blood type and ethnicities which are not reported here.

343

344 **Strength and limitations**

345 The study addressed the possible (or lack of) associations between placental TL with PE and  
346 other physiological and clinical phenotypes, using the largest multiracial cohort so far. In  
347 particular, the subjects include relatively large Asian (n = 133) and Pacific Islander populations  
348 (n=59), who were less studied in previous research compared to other ethnicities. One limitation  
349 is that the compositions of the cell types and their telomere length differences are also other  
350 possible sources of variations. As the placenta biology is stepping into single cell era,<sup>7,35</sup>  
351 technologies such as single cell sequencing that identifies cell types and proportions, and  $\Omega$ qPCR  
352 method that determines absolute telomere length from single-cell level,<sup>36</sup> could reveal the  
353 heterogeneity of TL that are masked by the current tissue level measurements.

354

## 355 **Conclusions**

356 In conclusion, our study showed no significant telomere change in PE complicated placentas  
357 compared to healthy controls. PE, though linked to stress and alteration in placentas, does not  
358 appear to lead to significant damage in placental telomere length, a biomarker for placenta aging.

359

## 360 **ACKNOWLEDGEMENT**

361 We thank Jason Delos Reyes from the Bioinformatics Core for matching the cases and control  
362 samples from the biobank. This research was supported by grants K01ES025434 awarded by  
363 NIEHS through funds provided by the trans-NIH Big Data to Knowledge (BD2K) initiative  
364 ([www.bd2k.nih.gov](http://www.bd2k.nih.gov)), P20 COBRE GM103457 awarded by NIH/NIGMS, R01 LM012373 and  
365 R01 LM012907 awarded by NLM, and R01 HD084633 awarded by NICHD to L.X. Garmire.

366

## 367 **REFERENCE**



- 368 1 Jeyabalan A. Epidemiology of preeclampsia: impact of obesity. *Nutr Rev.* 2013;71 Suppl 1(0  
369 1):S18-S25. doi:10.1111/nure.12055  
370
- 371 2 Duley L. The global impact of pre-eclampsia and eclampsia. *Semin Perinatol.* 2009;33(3):130-  
372 137. doi:10.1053/j.semperi.2009.02.010  
373
- 374 3 Lisonkova S, Joseph KS. Incidence of preeclampsia: risk factors and outcomes associated with  
375 early- versus late-onset disease. *Am J Obstet Gynecol.* 2013;209(6):544.e1-544.e12.  
376 doi:10.1016/j.ajog.2013.08.019  
377
- 378 4 Rana S, Lemoine E, Granger JP, Karumanchi SA. Preeclampsia: Pathophysiology, Challenges,  
379 and Perspectives [published correction appears in *Circ Res.* 2020 Jan 3;126(1):e8]. *Circ Res.*  
380 2019;124(7):1094-1112. doi:10.1161/CIRCRESAHA.118.313276  
381
- 382 5 Roberts JM, Hubel CA. The two stage model of preeclampsia: variations on the  
383 theme. *Placenta.* 2009;30 Suppl A(Suppl A):S32-S37. doi:10.1016/j.placenta.2008.11.009  
384
- 385 6 Benny PA, Alakwaa FM, Schlueter RJ, Lassiter CB, Garmire LX. A review of omics  
386 approaches to study preeclampsia. *Placenta.* 2020;92:17-27. doi:10.1016/j.placenta.2020.01.008  
387
- 388 7 Li H, Huang Q, Liu Y, Garmire LX. Single cell transcriptome research in human  
389 placenta. *Reproduction.* 2020;160(6):R155-R167. doi:10.1530/REP-20-0231  
390

- 391 8 Stewart JA, Chaiken MF, Wang F, Price CM. Maintaining the end: roles of telomere proteins  
392 in end-protection, telomere replication and length regulation. *Mutat Res.* 2012;730(1-2):12-19.  
393 doi:10.1016/j.mrfmmm.2011.08.011  
394
- 395 9 Demanelis K, Jasmine F, Chen LS, et al. Determinants of telomere length across human  
396 tissues. *Science.* 2020;369(6509):eaaz6876. doi:10.1126/science.aaz6876  
397
- 398 10 Sanders JL, Newman AB. Telomere length in epidemiology: a biomarker of aging, age-  
399 related disease, both, or neither?. *Epidemiol Rev.* 2013;35(1):112-131.  
400 doi:10.1093/epirev/mxs008  
401
- 402 11 Mayne BT, Leemaqz SY, Smith AK, Breen J, Roberts CT, Bianco-Miotto T. Accelerated  
403 placental aging in early onset preeclampsia pregnancies identified by DNA  
404 methylation. *Epigenomics.* 2017;9(3):279-289. doi:10.2217/epi-2016-0103  
405
- 406 12 Biron-Shental T, Sukenik-Halevy R, Sharon Y, et al. Short telomeres may play a role in  
407 placental dysfunction in preeclampsia and intrauterine growth restriction. *Am J Obstet Gynecol.*  
408 2010;202(4):381.e1-381.e3817. doi:10.1016/j.ajog.2010.01.036  
409
- 410 13 Broady AJ, Loichinger MH, Ahn HJ, Davy PM, Allsopp RC, Bryant-Greenwood GD.  
411 Protective proteins and telomere length in placentas from patients with pre-eclampsia in the last  
412 trimester of gestation. *Placenta.* 2017;50:44-52. doi:10.1016/j.placenta.2016.12.018  
413

414 14 Harville EW, Williams MA, Qiu CF, Mejia J, Risques RA. Telomere length, pre-eclampsia,  
415 and gestational diabetes. *BMC Res Notes*. 2010;3:113. Published 2010 Apr 23.

416 doi:10.1186/1756-0500-3-113

417

418 15 Cawthon RM. Telomere measurement by quantitative PCR. *Nucleic Acids Res*.

419 2002;30(10):e47. doi:10.1093/nar/30.10.e47

420 16 Buuren Svan, Groothuis-Oudshoorn K. Mice: Multivariate imputation by chained equations

421 INR. *Journal of Statistical Software*. 2011;45(3). doi:10.18637/jss.v045.i03

422

423 17 Ialongo C. Understanding the effect size and its measures. *Biochem Med (Zagreb)*.

424 2016;26(2):150-163. doi:10.11613/BM.2016.015

425

426 18 R: A language and environment for statistical computing. Version 4.0.2 R Foundation for

427 Statistical Computing, Vienna, Austria: R Core Team; 2021

428

429 19 Venables WN, Ripley BD (2002). *Modern Applied Statistics with S*, Fourth edition. Springer,

430 New York. ISBN 0-387-95457-0, <https://www.stats.ox.ac.uk/pub/MASS4/>.

431

432 20 gridExtra: Miscellaneous Functions for "Grid" Graphics. R package version 2.3. Baptiste

433 Auguie; 2017.

434

- 435 21 Constantin Ahlmann-Eltze (2019). ggsignif: Significance Brackets for 'ggplot2'. R package  
436 version 0.6.0. <https://CRAN.R-project.org/package=ggsignif>  
437
- 438 22 H. Wickham. ggplot2: Elegant Graphics for Data Analysis. Springer-Verlag New York, 2016.  
439
- 440 23 Hadley Wickham (2020). tidyr: Tidy Messy Data. R package version 1.1.2. [https://CRAN.R-](https://CRAN.R-project.org/package=tidyr)  
441 [project.org/package=tidyr](https://CRAN.R-project.org/package=tidyr)  
442
- 443 24 Hadley Wickham, Romain François, Lionel Henry and Kirill Müller (2020). dplyr: A  
444 Grammar of Data Manipulation. R package version 1.0.2. [https://CRAN.R-](https://CRAN.R-project.org/package=dplyr)  
445 [project.org/package=dplyr](https://CRAN.R-project.org/package=dplyr)  
446
- 447 25 Taiyun Wei and Viliam Simko (2017). R package "corrplot": Visualization of a Correlation  
448 Matrix (Version 0.84). Available from <https://github.com/taiyun/corrplot>  
449
- 450 26 Goldenberg RL, Culhane JF, Iams JD, Romero R. Epidemiology and causes of preterm  
451 birth. *Lancet*. 2008;371(9606):75-84. doi:10.1016/S0140-6736(08)60074-4  
452
- 453 27 Gielen M, Hageman G, Pachen D, Derom C, Vlietinck R, Zeegers MP. Placental telomere  
454 length decreases with gestational age and is influenced by parity: a study of third trimester live-  
455 born twins. *Placenta*. 2014;35(10):791-796. doi:10.1016/j.placenta.2014.05.010  
456

- 457 28 Factor-Litvak P, Susser E, Kezios K, et al. Leukocyte Telomere Length in Newborns:  
458 Implications for the Role of Telomeres in Human Disease. *Pediatrics*. 2016;137(4):e20153927.  
459 doi:10.1542/peds.2015-3927  
460
- 461 29 Wojcicki JM, Olveda R, Heyman MB, et al. Cord blood telomere length in Latino infants:  
462 relation with maternal education and infant sex. *J Perinatol*. 2016;36(3):235-241.  
463 doi:10.1038/jp.2015.178  
464
- 465 30 Martens, D.S., Plusquin, M., Gyselaers, W. et al. Maternal pre-pregnancy body mass index  
466 and newborn telomere length. *BMC Med* 14, 148 (2016). [https://doi.org/10.1186/s12916-016-](https://doi.org/10.1186/s12916-016-0689-0)  
467 [0689-0](https://doi.org/10.1186/s12916-016-0689-0)  
468
- 469 31 Okuda, K., Bardeguet, A., Gardner, J. et al. Telomere Length in the Newborn. *Pediatr Res* 52,  
470 377–381 (2002). <https://doi.org/10.1203/00006450-200209000-00012>  
471
- 472 32 Lynch SM, Peek MK, Mitra N, et al. Race, Ethnicity, Psychosocial Factors, and Telomere  
473 Length in a Multicenter Setting. *PLoS One*. 2016;11(1):e0146723. Published 2016 Jan 11.  
474 doi:10.1371/journal.pone.0146723  
475
- 476 33 Needham BL, Hicken MT, Govia IO, Mitchell C, Abdou CM. Maternal Social Disadvantage  
477 and Newborn Telomere Length in Archived Dried Blood Spots from the Michigan Neonatal  
478 Biobank. *Biodemography Soc Biol*. 2017;63(3):221-235. doi:10.1080/19485565.2017.1300520  
479

480 34 Franchini M, Mengoli C, Lippi G. Relationship between ABO blood group and pregnancy  
481 complications: a systematic literature analysis. *Blood Transfus.* 2016;14(5):441-448.  
482 doi:10.2450/2016.0313-15

483  
484 35 Barrozo ER, Aagaard KM. Human placental biology at single-cell resolution: a  
485 contemporaneous review. *BJOG.* 2022;129(2):208-220. doi:10.1111/1471-0528.16970

486  
487 36 Xiong F, Frasch WD.  $\Omega$ qPCR measures telomere length from single-cells in base pair  
488 units. *Nucleic Acids Res.* 2021;49(20):e120. doi:10.1093/nar/gkab753

489

490

## 491 TABLES

492

493 **Table 1: Differences in demographic and clinical variables between severe PE cases and**  
494 **controls.**

| <i>Variables</i>              | <i>Preeclampsia (n = 120)</i><br><i>Mean(sd)</i> | <i>Control (n = 129)</i><br><i>Mean(sd)</i> | <i>p-value*</i><br><i>(Two group)</i> |
|-------------------------------|--------------------------------------------------|---------------------------------------------|---------------------------------------|
| <i>Gestational Age (week)</i> | 35.36(2.90)                                      | 39.33 (0.85)                                | 1.76e-29<br>***                       |
| <i>Mother's Age</i>           | 29.81(6.54)                                      | 29.53(6.53)                                 | NS                                    |
| <i>Weight Gain (lbs)</i>      | 34.17(19.62)                                     | 31.80(16.21)                                | NS                                    |
| <i>Mother's Height</i>        | 5.21(0.47)                                       | 5.30(0.38)                                  | NS                                    |
| <i>Pre-pregnancy BMI</i>      | 29.10(7.53)                                      | 28.01(6.19)                                 | NS                                    |
| <i>Blood Type (n)</i>         |                                                  |                                             | NS                                    |
| A                             | 34                                               | 43                                          | -                                     |
| AB                            | 11                                               | 9                                           | -                                     |

|                                        |             |            |             |
|----------------------------------------|-------------|------------|-------------|
| <i>B</i>                               | 29          | 26         | -           |
| <i>O</i>                               | 46          | 51         | -           |
| <b><i>Ethnicity (n)</i></b>            |             |            | NS          |
| <i>African American</i>                | 2           | 2          | -           |
| <i>Asian</i>                           | 62          | 72         | -           |
| <i>Caucasian</i>                       | 15          | 17         | -           |
| <i>Pacific Islander</i>                | 32          | 27         | -           |
| <i>Latin</i>                           | 10          | 11         | -           |
| <b><i>Ln Telomere Length</i></b>       | 5.58 (0.42) | 5.41(0.38) | 1.18e-3 *** |
| <b><i>Vaginal Bleeding (n)</i></b>     | 10          | 32         | 9.70e-3***  |
| <b><i>Macrosomia(n)</i></b>            | 2           | 11         | 0.032*      |
| <b><i>Chronic Hypertension (n)</i></b> | 35          | 11         | 5.58e-05*** |
| <b><i>History of Asthma (n)</i></b>    | 21          | 19         | NS          |
| <b><i>History of Anemia (n)</i></b>    | 28          | 15         | 0.023*      |
| <b><i>Baby sex (n)</i></b>             |             |            | NS          |
| <i>Male</i>                            | 69          | 61         | -           |
| <i>Female</i>                          | 51          | 68         | -           |
| <b><i>Membrane ruptured(n)</i></b>     | 23          | 51         | 7.38e-3***  |

495 \*Categorical variables are compared with Chi-square test. Numeric variables are compared  
 496 with t-test.

497 \* Significance level: \* <0.05, \*\* <0.01, \*\*\*<0.001

498

499

500 **Table 2: The optimal linear regression model results using 249 samples**

| <b><i>Variable Name</i></b>          | <b><i>Beta value</i></b> | <b><i>Standard Error</i></b> | <b><i>P-value</i></b> | <b><i>Significance</i></b> |
|--------------------------------------|--------------------------|------------------------------|-----------------------|----------------------------|
| <b><i>(Intercept)</i></b>            | 7.42                     | 0.53                         | < 2e-16               | ***                        |
| <b><i>Mothers' Age</i></b>           | 0.0047                   | 0.0039                       | 0.23                  | NS                         |
| <b><i>Gestational age (week)</i></b> | -0.054                   | 0.013                        | 6.10E-05              | ***                        |
| <b><i>Baby sex male</i></b>          | -1.50                    | 0.66                         | 0.024                 | *                          |

|                                  |       |       |       |   |
|----------------------------------|-------|-------|-------|---|
| <i>Blood type O vs non-O</i>     | -0.11 | 0.05  | 0.039 | * |
| <i>Latino vs non-Latino</i>      | 0.23  | 0.090 | 0.012 | * |
| <i>Gestational age: Baby sex</i> |       |       |       |   |
| <i>male</i>                      | 0.039 | 0.017 | 0.029 | * |

---

501

502 \* *Significance level: \* <0.05, \*\* <0.01, \*\*\*<0.001*

503

#### 504 **FIGURE LEGENDS**

505 Figure 1: The lack of association between severe PE and TL after stratifying by gestational age.

506 **A:** Distribution of ln-transformed relative placental TL in the third trimester. Blue color: severe

507 PE samples; Red color: control samples. **B:** Top 10 most relevant phenotypic variables to fit

508 severe PE by logistic regression. **C:** Top 10 variables with the highest proportion of variance

509 explained (PVE), per ANOVA analysis. **D:** Scatter plot of TL by gestational age, the solid line

510 represents linear regression of TL on gestational age. **E:** Boxplots of placenta TL of term PE

511 samples (n=29) and term controls (n=133). **F:** Boxplots of placenta TL of term PE samples

512 (n=29) and the subset of matched term controls (n=29) stratified by gestational age (38, 39, 40+

513 weeks).

514

515 Figure 2: The associations between placental TL and other demographic and clinical variables. **A:**

516 The interactive effect of baby sex and gestational age on placental TL; red color: female, blue

517 color: male. Red and blue lines: linear regression of TL over gestational age for female (red) and

518 male babies (blue). **B:** The boxplot of placental TLs in Latino mothers vs non-Latino mothers. **C:**

519 The boxplot of placental TL in mothers of blood type O vs mothers of non-O blood type.

520

521





A

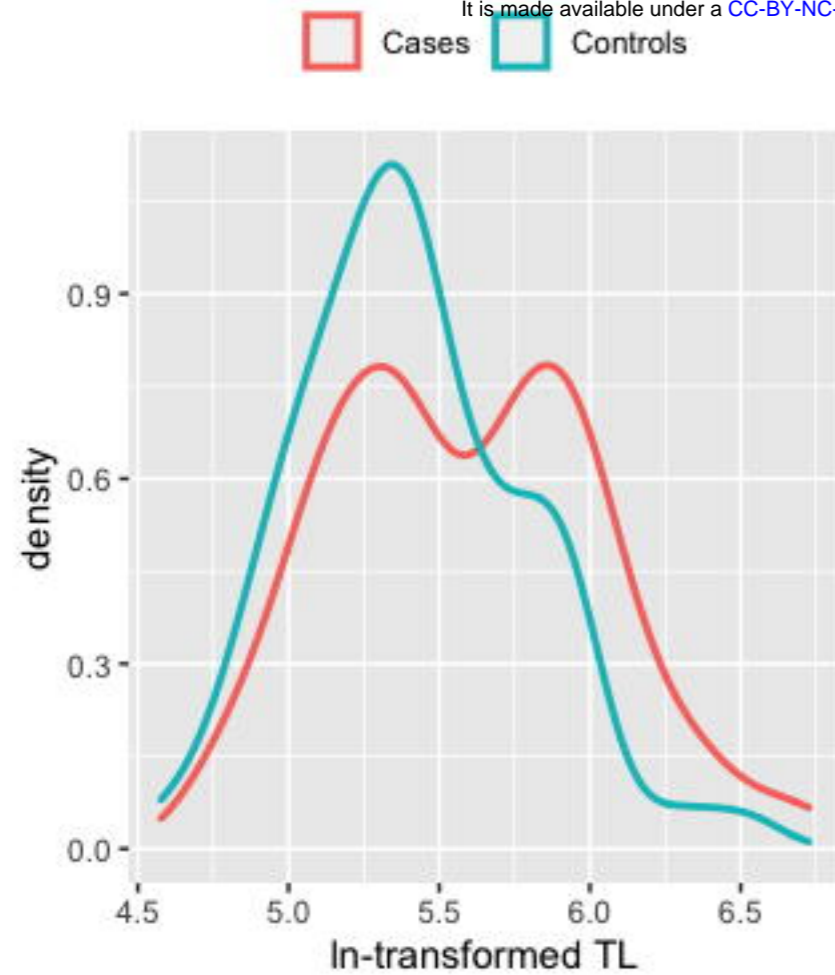

B

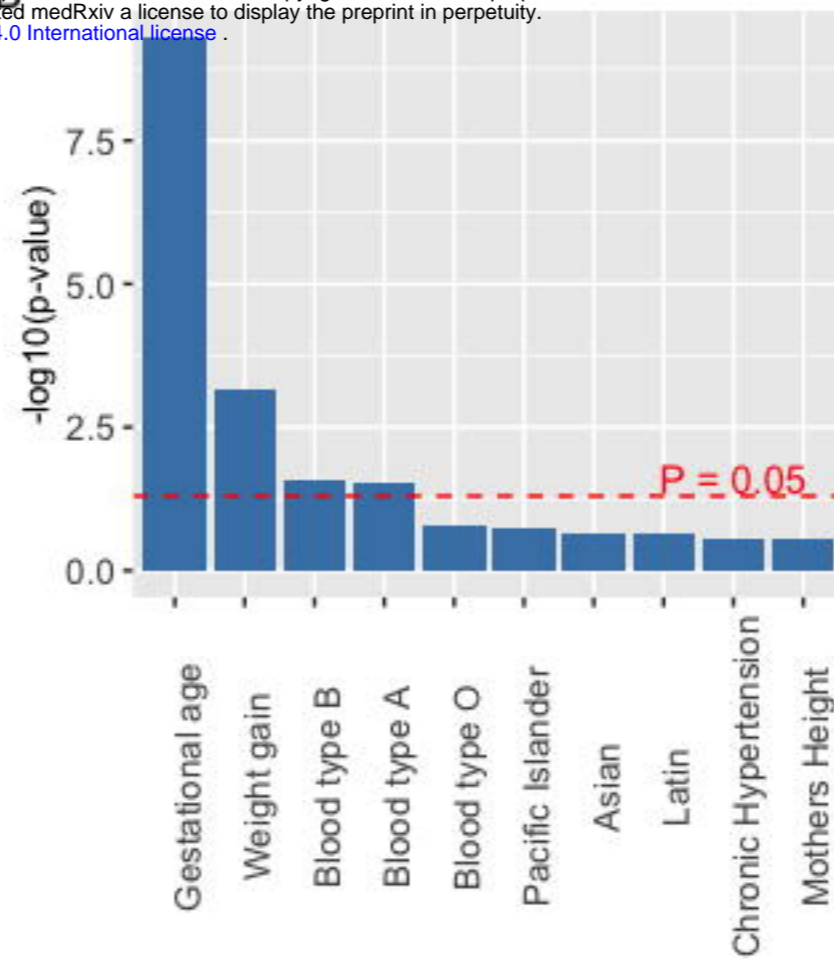

C

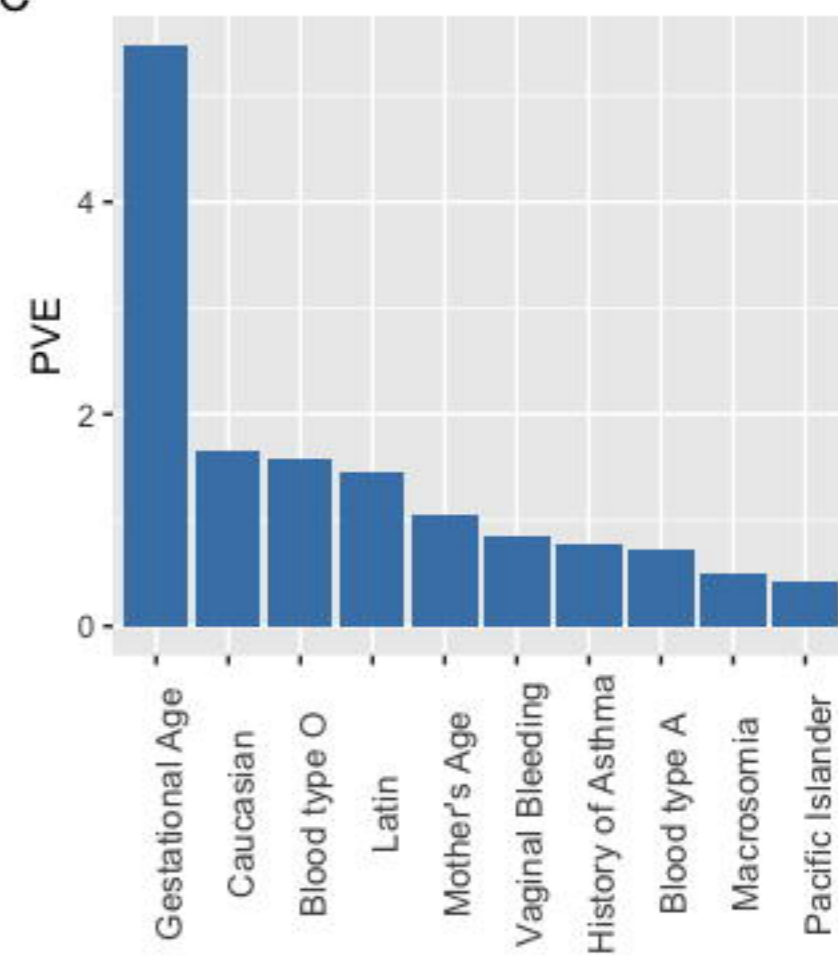

D

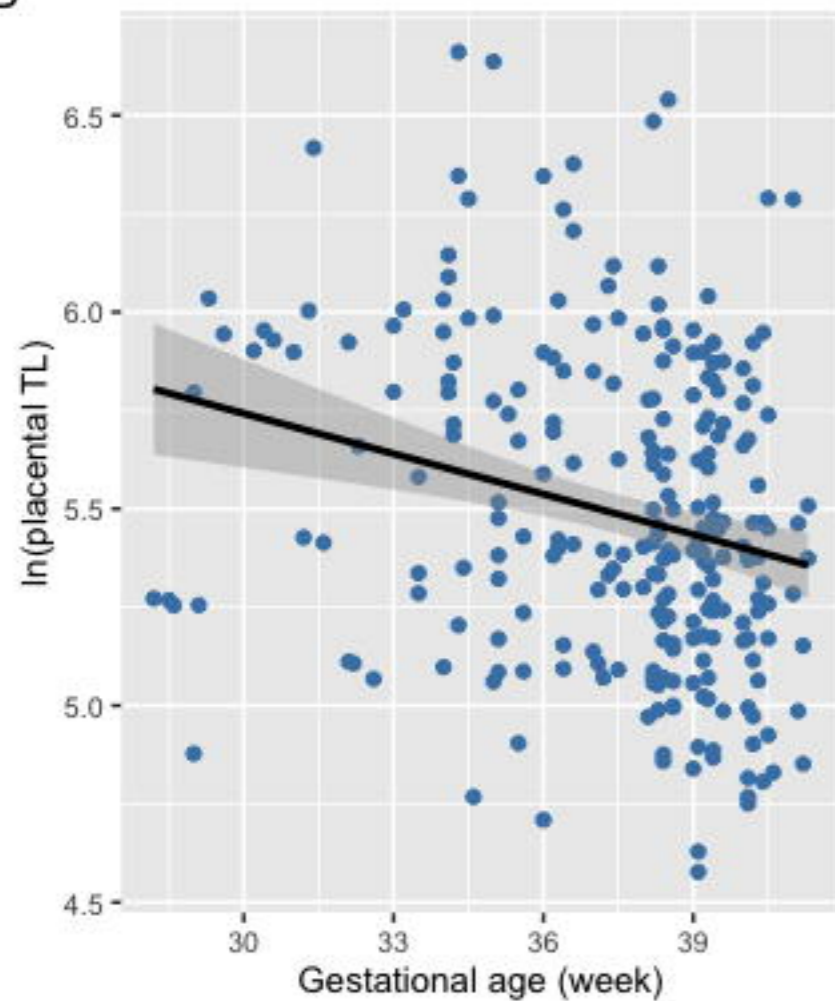

E

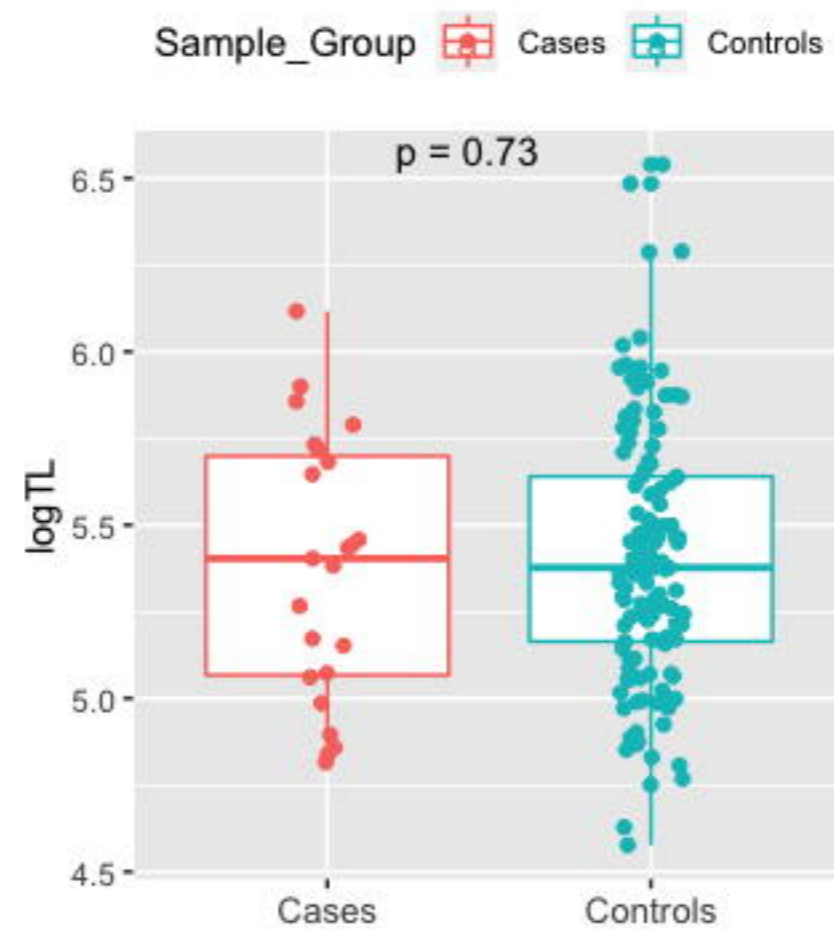

F

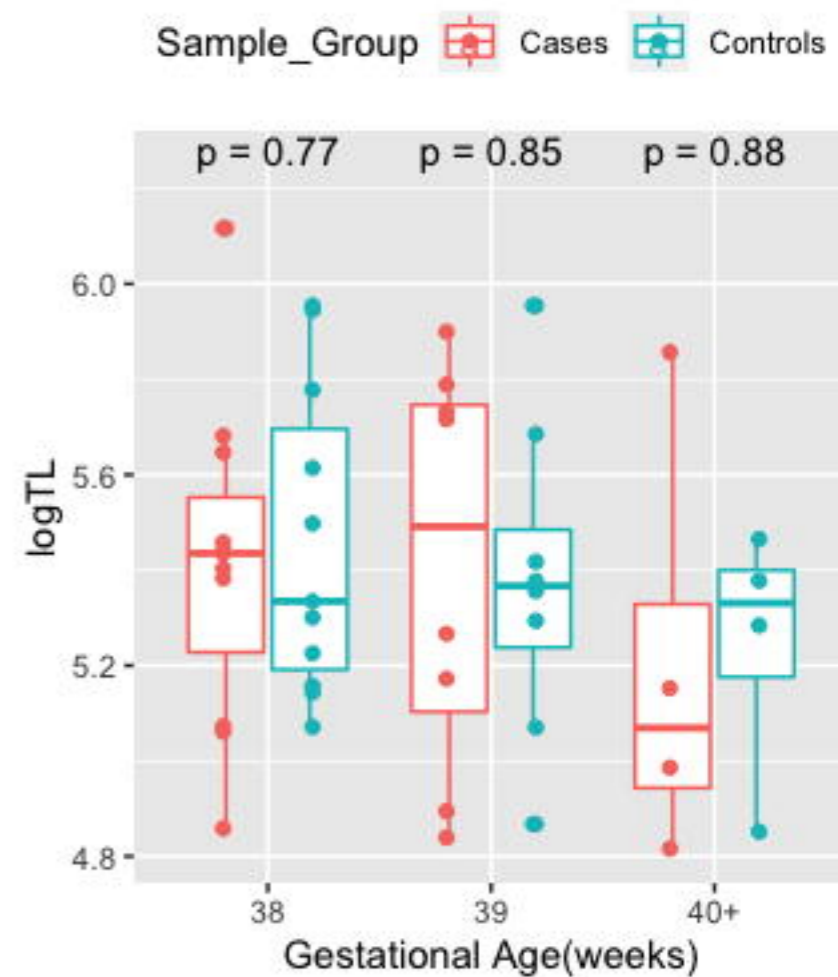

A

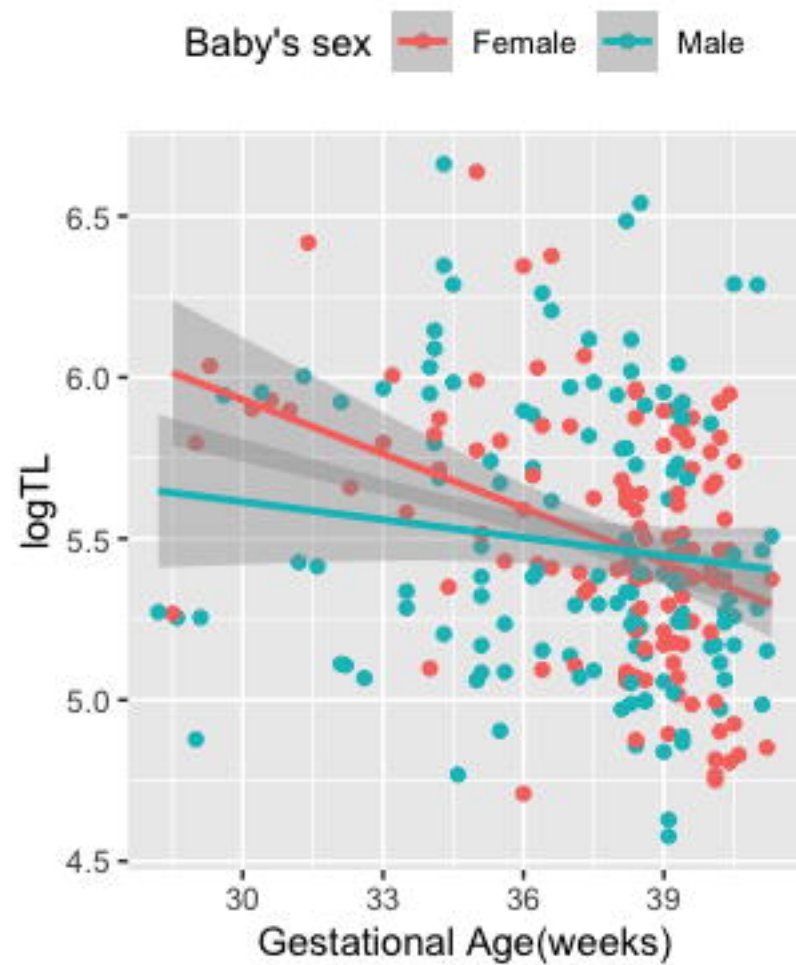

B

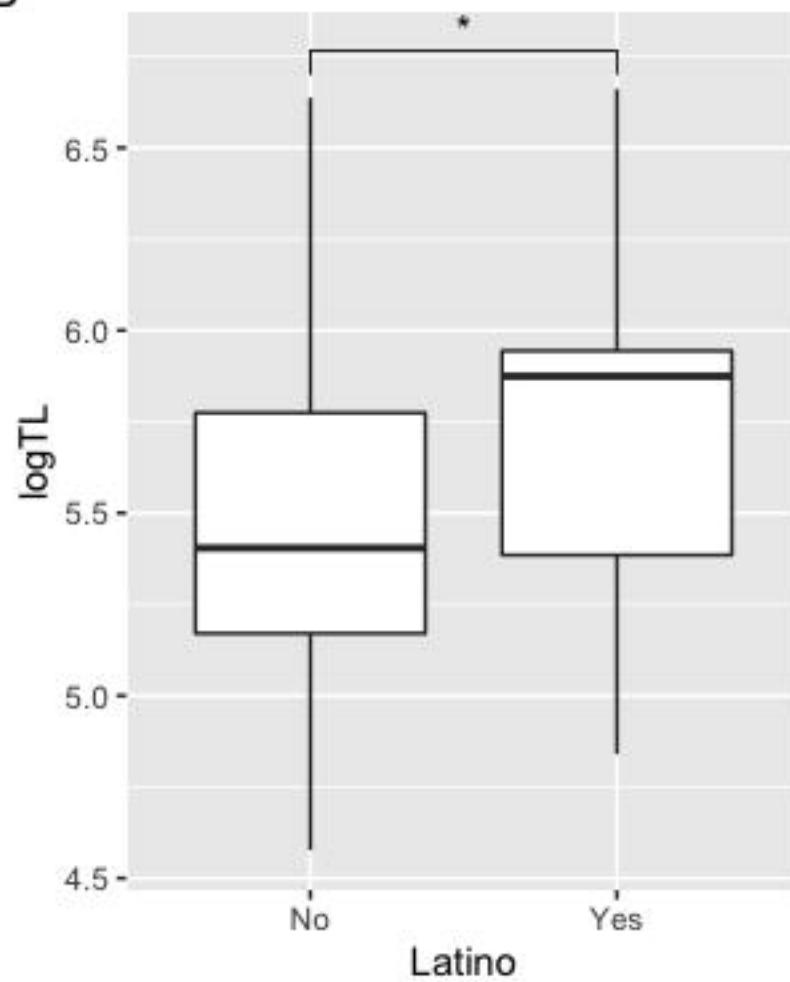

C

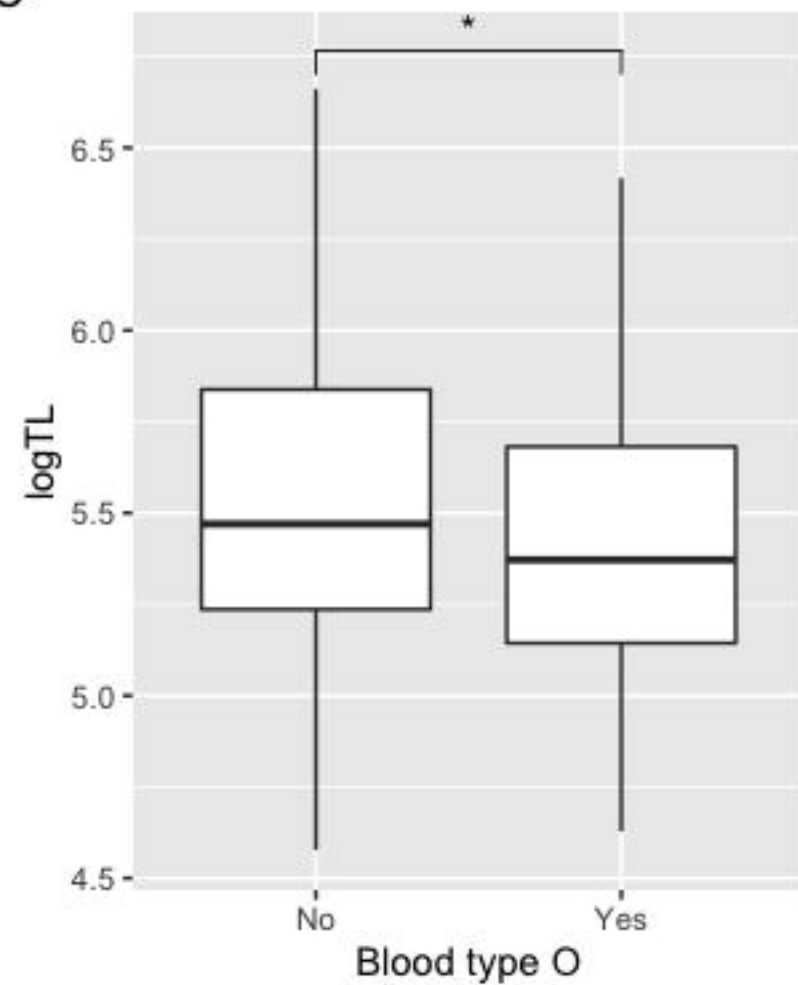

Source: https://medrxiv.org/content/10.1101/2022.02.28.22271630v1.full.pdf
